# Supplementary material for: Theoretical studies on the dynamics of DNA fragment translocation through multilayer graphene nanopores
Source: Royal Society of Chemistry journal article supplement (doi:10.1039/c4ra05909c), 2014-01-01
Supplement: c4ra05909c1.pdf [file c4ra05909c1.pdf]

## Supporting information

### **Theoretical studies on the dynamics of DNA fragment translocation through multilayer graphene nanopores**

Lijun Liang<sup>1,2</sup>, Zhisen Zhang<sup>1</sup>, Jiawei Shen<sup>3</sup>, Kong Zhe<sup>4</sup>, Qi Wang<sup>1,\*</sup>, Tao Wu<sup>1</sup>, Hans Ågren<sup>2</sup>,  
and Yaoquan Tu<sup>2,\*</sup>

<sup>1</sup>Department of Chemistry and Soft Matter Research Center, Zhejiang University, Hangzhou 310027, People's Republic of China

<sup>2</sup>Division of Theoretical Chemistry and Biology, School of Biotechnology, KTH Royal Institute of Technology, SE-10691 Stockholm, Sweden

<sup>3</sup>School of Medicine, Hangzhou Normal University, Hangzhou 310016, People's Republic of China

<sup>4</sup>College of Materials and Environmental Engineering, Hangzhou Dianzi University, Hangzhou, Zhejiang 310018, China

\*Corresponding authors.

Fax: +86-571-87951895.

E-mail addresses:

qiwang@zju.edu.cn (Q. Wang)

tu@theochem.kth.se (Yaoquan Tu)

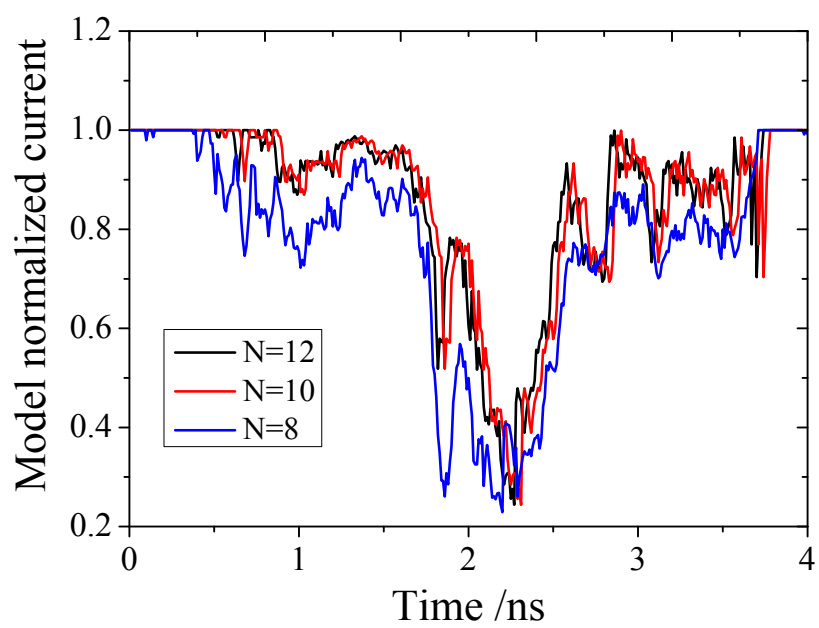

Fig. S1, Change of the model normalized current with respect to the number of parts  $N$  in the  $Z$  direction for the nanopore of 3 layers.
